# Supplementary material for: Development of a highly sensitive magneto-enzyme lateral flow immunoassay for dengue NS1 detection
Source: PeerJ. 2019 Sep 25;7:e7779. doi: 10.7717/peerj.7779 (PMC6765353; doi:10.7717/peerj.7779)
Supplement: Supplemental Information 3 [file peerj-07-7779-s003.xlsx]

## Sheet: DENV-1
	Negative	1.0 ng/mL	2.5 ng/mL	10.0 ng/mL	50.0 ng/mL	100.0 ng/mL	250.0 ng/mL	1000.0 ng/mL
rep 1	142.778	152.556	278.87	678.163	1697.53	1952.99	2600.6	2683.77
rep 2	136.435	156.435	288.213	694.991	1744.13	1953.28	2643.36	2712.53
rep 3	173.021	160.849	264.213	651.042	1644.41	1900.84	2656.06	2667.96
rep 4	121.595	185.728	292.456	703.749	1584.99	2180.77	2676.3	2686.58
rep 5	162.647	122.778	283.92	669.335	1431.94	2085.36	2602.08	2708.82
rep 6	175.78	178.607	284.127	643.335	1653.06	2177.36	2617.89	2701.53
rep 7	146.445	156.95	242.042	688.042	1468.53	1995.28	2670.67	2615.82
rep 8	176.01	142.607	291.749	695.577	1648.53	1993.53	2683.3	2668.6

## Sheet: DENV-2
	Negative	0.5 ng/mL	1.0 ng/mL	5.0 ng/mL	10.0 ng/mL	50.0 ng/mL	100.0 ng/mL	250.0 ng/mL
rep 1	144.071	164.607	176.728	900.012	1550.58	2174.72	2499.41	2687.11
rep 2	143.245	153.899	208.749	899.527	1568.31	2258.7	2732.23	2672.41
rep 3	161.899	129.364	190.506	869.406	1643.41	2274.99	2640.14	2619.46
rep 4	149.192	104.485	230.971	734.87	1493.28	2301.41	2643.53	2705.7
rep 5	154.778	191.899	174.142	886.11	1329.75	2408.82	2658.36	2568.41
rep 6	148.071	138.678	206.506	907.113	1477.87	2298.28	2731.59	2654.3
rep 7	141.899	152.678	216.506	997.163	1424.87	2422.58	2609.99	2768.36
rep 8	152.021	179.092	225.749	872.52	1324.7	2324.87	2689.53	2761.23

## Sheet: DENV-3
	Negative	1 ng/mL	2.5 ng/mL	10 ng/mL	50 ng/mL	100 ng/mL	250 ng/mL	1000 ng/mL
rep 1	161.556	160.556	346.213	793.406	1519.94	2148.03	2341.16	2413.75
rep 2	170.092	150.092	219.092	571.627	1388.87	2069.77	2479.04	2350.34
rep 3	187.506	177.506	156.849	625.456	1508.46	2018.99	2511.58	2727.6
rep 4	161.899	167.899	219.425	542.69	1523.04	2176.11	2508.75	2559.7
rep 5	170.456	150.456	272.335	754.82	1568.87	1969.53	2325.04	2500.8
rep 6	132.092	162.092	260.385	714.456	1418.82	1941.94	2788.82	2398.46
rep 7	137.504	137.504	386.042	840.87	1633.06	1909.28	2585.41	2554.96
rep 8	130.823	163.823	295.627	803.456	1543.23	2008.53	2643.13	2725.48

## Sheet: DENV-4
	Negative	5 ng/mL	10 ng/mL	50 ng/mL	100 ng/mL	250 ng/mL	1000 ng/mL
rep 1	159.749	115.87	487.991	1222.16	1882.53	2041.87	2055.94
rep 2	167.021	146.284	519.335	1406.75	1811.82	2266.53	2150.77
rep 3	159.728	148.435	307.042	1302.46	1463.49	2162.46	2060.34
rep 4	120.799	147.142	239.799	1460.58	1550.58	2021.65	2118.16
rep 5	205.971	160.07	348.577	1429.87	1483.78	2122.58	2164.04
rep 6	108.335	162.385	309.385	1424.82	1491.99	2139.16	2092.41
rep 7	145.799	221.263	241.749	1540.73	1671.46	2051.75	2146.28
rep 8	176.607	153.749	296.799	1163.57	1663.41	2114.21	2209.28
