# Supplementary material for: Development of a highly sensitive magneto-enzyme lateral flow immunoassay for dengue NS1 detection
Source: PeerJ. 2019 Sep 25;7:e7779. doi: 10.7717/peerj.7779 (PMC6765353; doi:10.7717/peerj.7779)
Supplement: Supplemental Information 4 [file peerj-07-7779-s004.xlsx]

## Sheet: mAb pair
	Selection of antibody pair for LFIA detecting dengue NS1
Fitgzerald	Pair #1: 10-2698: capture antibody, 10-2699: detection antibody
		DENV-1						DENV-2						DENV-3						DENV-4
		Rep 1		Rep 2		Rep 3		Rep 1		Rep 2		Rep 3		Rep 1		Rep 2		Rep 3		Rep 1		Rep 2		Rep 3
		CL	TL	CL	TL	CL	TL	CL	TL	CL	TL	CL	TL	CL	TL	CL	TL	CL	TL	CL	TL	CL	TL	CL	TL
		8401.15	5529.88	8836.43	5044.94	9036.72	6336.78	8873.2	5573.83	8930.02	5525.64	9115.72	6839.7	8331.07	3388.16	8479.36	3252.23	8877.09	4124.03	9186.4	2517.47	8227.07	2590.03	8449.9	2881.53
	T/(T+C)	0.396947		0.363432		0.412188		0.385811		0.382248		0.428676		0.289111		0.27722		0.317206		0.215097		0.239439		0.254296
	Average	0.390856						0.398912						0.294512						0.236277
	STD	0.0249423						0.0258381						0.0205329						0.0197894
EastCoast Bio	Pair #2: HM026: capture antibody, HM164: detection antibody
		DENV-1						DENV-2						DENV-3						DENV-4
		Rep 1		Rep 2		Rep 3		Rep 1		Rep 2		Rep 3		Rep 1		Rep 2		Rep 3		Rep 1		Rep 2		Rep 3
		CL	TL	CL	TL	CL	TL	CL	TL	CL	TL	CL	TL	CL	TL	CL	TL	CL	TL	CL	TL	CL	TL	CL	TL
		7614.43	2489.91	7937.73	2951.67	6842.42	2741.41	7726.71	3627.57	7978.6	3631.07	7493.74	3535.45	7244.85	2623.17	7107.14	2782.28	7125.23	2808.24	6385.69	1912.51	6476.8	1623.05	6800.05	1729.63
	T/(T+C)	0.24642		0.271059		0.286046		0.319489		0.312762		0.320554		0.265825		0.281339		0.282705		0.230473		0.20038		0.202778
	Average	0.267842						0.317602						0.276623						0.21121
	STD	0.0200078						0.0042247						0.00937597						0.016725

## Sheet: particle size
Optimization of super-paramagnetic nanoparticle size for LFIA detecting dengue NS1.
		100 nm						200 nm
		Rep 1		Rep 2		Rep 3		Rep 1		Rep 2		Rep 3
		CL	TL	CL	TL	CL	TL	CL	TL	CL	TL	CL	TL
		8023.91	3733.22	8647.26	3070.57	7563.68	3616.01	9962.69	7249.66	8445.37	6267.26	9886.76	6507.99
	T/(T+C)	0.317528		0.262043		0.323445		0.421189		0.425978		0.396956
	Average	0.301005						0.414708
	STD	0.0338718						0.015559

## Sheet: Membrane Type
	Selection of nitrocellulose membrane
		CNPC-SS12 10 μ						CN140						CN95
		Rep 1		Rep 2		Rep 3		Rep 1		Rep 2		Rep 3		Rep 1		Rep 2		Rep 3
		CL	TL	CL	TL	CL	TL	CL	TL	CL	TL	CL	TL	CL	TL	CL	TL	CL	TL
	Average	8507.54	5598.45	8432.4	6139.47	8414.66	5818.76	9107.76	4996.69	9447.31	5089.68	9550.87	5136.97	5720.19	2874.24	5572.3	2903.58	5650.72	2828.48
	T/(T+C)	0.396884		0.421324		0.408809		0.354263		0.350119		0.349743		0.334431		0.34257		0.333579
	Average	0.409006						0.351375						0.33686
	STD	0.0122208						0.00250833						0.00496321

## Sheet: Amounts capture Ab
Optimization of amounts of capture antibody to be immobilized at the test line.
		0.5 µl						1 µl						1.5 µl						2 µl
		Rep 1		Rep 2		Rep 3		Rep 1		Rep 2		Rep 3		Rep 1		Rep 2		Rep 3		Rep 1		Rep 2		Rep 3
		CL	TL	CL	TL	CL	TL	CL	TL	CL	TL	CL	TL	CL	TL	CL	TL	CL	TL	CL	TL	CL	TL	CL	TL
		8261.97	2377.17	9075.59	1981.05	8507.97	2294.38	9027.23	3704.54	9568.43	4072.28	10091.7	4104.2	9826.47	6121.96	7983.85	6083.15	9223.47	5686.1	10507	7939.1	9841.38	6255.66	10610.7	6681.46
	T/(T+C)	0.223436		0.179173		0.212396		0.290968		0.298538		0.289111		0.38386		0.432441		0.381373		0.430395		0.388622		0.386387
	Average	0.205002						0.292873						0.399225						0.401801
	STD	0.0230396						0.00499372						0.0287935						0.0247884

## Sheet: Amount magnetic nanoparticles
Optimization of amounts of biotinylated, mAb-conjugated magnetic nanoparticles.
		5 µl			2.5 µl			2.5 µl
		Rep 1	Rep 2	Rep 3	Rep 1	Rep 2	Rep 3	Rep 1	Rep 2	Rep 3
		TL	TL	TL	TL	TL	TL	TL	TL	TL
		7297.23	6539.01	7283.56	4893.83	4703.4	4790.86	1557.02	1398.45	2045.44
	Average	7039.93			4796.03			1666.97
	STD	433.865			95.3196			337.215
